# Supplementary material for: Sociodemographic Disparities in Queue Jumping for Emergency Department Care
Source: PubMed Central journal article supplement (PMC10383013; doi:10.1001/jamanetworkopen.2023.26338), 2023-07-28
Supplement: jamanetwopen-e2326338-s002.pdf [file jamanetwopen-e2326338-s002.pdf]

## Data Sharing Statement

Sangal. Sociodemographic Disparities in Queue Jumping for Emergency Department Care. *JAMA Netw Open*. Published July 28, 2023. doi:10.1001/jamanetworkopen.2023.26338

### Data

**Data available:** No

### Additional Information

**Explanation for why data not available:** Not approved for data sharing outside institution
